# 1 **A brain structural connectivity biomarker for diagnosis of autism** 2 **spectrum disorder in early childhood**

3

## 4 **Authors**

5 Xi Jiang, PhD<sup>1\*</sup>, Xiao-Jing Shou, PhD<sup>2,3\*</sup>, Zhongbo Zhao, MSc<sup>1</sup>, Fanchao Meng, MD<sup>2</sup>, Jiao  
6 Le, PhD<sup>1,5</sup>, Tianjia Song, PhD<sup>2</sup>, Xinjie Xu, PhD<sup>2</sup>, Xiaoyan Ke, MD<sup>4</sup>, Yuzhong Chen, BS<sup>1</sup>,  
7 Xiaoe Cai, MPhil<sup>2</sup>, Weihua Zhao, PhD<sup>1</sup>, Juan Kou, PhD<sup>1</sup>, Ran Huo MD<sup>2</sup>, Ying Liu MD<sup>6</sup>,  
8 Huishu Yuan MD<sup>6</sup>, Yan Xing MD<sup>7</sup>, Jisheng Han, BS<sup>2</sup>, Songping Han PhD<sup>8</sup>, Yun Li, MD<sup>4</sup>,  
9 Hua Lai, BS<sup>5</sup>, Lan Zhang, MM<sup>5</sup>, Meixiang Jia, BS<sup>9</sup>, Jing Liu, MD<sup>9</sup>, Keith M. Kendrick,  
10 PhD<sup>1#</sup>, Rong Zhang, MD<sup>2,10#</sup>

11

12 <sup>1</sup>The Clinical Hospital of Chengdu Brain Science Institute, MOE Key Lab for  
13 Neuroinformatics, University of Electronic Science and Technology of China, Chengdu,  
14 611731, China.

15 <sup>2</sup>Neuroscience Research Institute; Key Laboratory for Neuroscience, Ministry of Education  
16 of China; Key Laboratory for Neuroscience, National Committee of Health and Family  
17 Planning of China; and Department of Neurobiology, School of Basic Medical Sciences,  
18 Peking University, Beijing, 100191, China.

19 <sup>3</sup>State Key Laboratory of Cognitive Neuroscience and Learning; Beijing Key Laboratory of  
20 Brain Imaging and Connectomics; and IDG/McGovern Institute for Brain Research, Beijing  
21 Normal University, Beijing, 100875, China.

22 <sup>4</sup>Child Mental Health Research Center, Nanjing Brain Hospital Affiliated of Nanjing Medical  
23 University, Nanjing, 210029, China.

24 <sup>5</sup>Chengdu Women's and Children's Central Hospital, School of Medicine, University of  
25 Electronic Science and Technology of China, Chengdu, 611731, China.

26 <sup>6</sup>Radiology Department, Peking University Third Hospital, Beijing, 100191, China.

27 <sup>7</sup>Department of Pediatrics, Peking University Third Hospital, Beijing, 100191, China.

28 <sup>8</sup>Wuxi Shengpingxintai Medical Technology Co., Ltd., Wuxi, 214091, China.

29 <sup>9</sup>Mental Health Institute, Peking University, Key Laboratory of Ministry of Health, The  
30 Ministry of Public Health, Beijing, 100191, China.

31 <sup>10</sup>Autism Research Center of Peking University Health Science Center, Beijing, 100191,  
32 China

33

34 **\*Co-first authors:** Xi Jiang and Xiao-Jing Shou

35 **#Joint corresponding authors:**

36 Professor Keith M. Kendrick,

37 The Clinical Hospital of Chengdu Brain Science Institute, MOE Key Laboratory for

38 Neuroinformation,

39 University of Electronic Science and Technology of China,

40 No. 2006, Xiyuan Ave, West High-Tech Zone, Chengdu, 611731, China

41 Tel/Fax: 86-28-61830811

42 E-mail: [kkendrick@uestc.edu.cn](mailto:kkendrick@uestc.edu.cn)

43

44 Dr. Rong Zhang,

45 Neuroscience Research Institute; Key Laboratory for Neuroscience, Ministry of Education of

46 China; Key Laboratory for Neuroscience, National Committee of Health and Family

47 Planning of China; Department of neurobiology, School of Basic Medical Sciences, Peking

48 University,

49 No. 38, Xueyuan Road, Haidian District, Beijing, 100191, China

50 Tel: 86-10-82801152

51 E-mail: [zhangrong@bjmu.edu.cn](mailto:zhangrong@bjmu.edu.cn)

52

53 **Abstract**

54 **Objective:** Autism spectrum disorder (ASD) is associated with altered brain development,  
55 but it is unclear which specific structural changes may serve as potential diagnostic markers.  
56 This study aimed to identify and model brain-wide differences in structural connectivity  
57 using MRI diffusion tensor imaging (DTI) in young ASD and typically developing (TD)  
58 children (3-5-6 years old).

59 **Methods:** Ninety-three ASD and 26 TD children were included in a discovery dataset and 12  
60 ASD and 9 TD children from different sites included as independent validation datasets.  
61 Brain-wide (294 regions) structural connectivity was measured using DTI (fractional  
62 anisotropy, FA) under sedation together with symptom severity and behavioral and cognitive  
63 development. A connection matrix was constructed for each child for comparisons between  
64 ASD and TD groups. Pattern classification was performed and the resulting model tested on  
65 two independent datasets.

66 **Results:** Thirty-three structural connections showed increased FA in ASD compared to TD  
67 children and associated with both symptom severity and general cognitive development. The  
68 majority (29/33) involved the frontal lobe and comprised five different networks with  
69 functional relevance to default mode, motor control, social recognition, language and reward.  
70 Overall, classification accuracy is very high in the discovery dataset 96.77%, and 91.67% and  
71 88.89% in the two independent validation datasets.

72 **Conclusions:** Identified structural connectivity differences primarily involving the frontal  
73 cortex can very accurately distinguish individual ASD from TD children and may therefore  
74 represent a robust early brain biomarker.

75

76 **Keywords**

77 autism; neuroimaging; diffusion tensor imaging; fractional anisotropy; brain structural  
78 connectivity; diagnosis; early childhood

## 79 **Introduction**

80 There is an increasing consensus that children with autism spectrum disorder (ASD) have an  
81 aberrant pattern of brain development.<sup>1-2</sup> A number of structural magnetic resonance imaging  
82 studies using diffusion tensor imaging (DTI) have identified altered fractional anisotropy  
83 (FA), which is a widely used index in DTI to reflect axonal density and myelination, in  
84 individuals with ASD, particularly in the frontal,<sup>3-5</sup> occipital lobes,<sup>6</sup> and corpus callosum.<sup>4,7</sup>  
85 Developmental changes in FA occur with increases in fiber tracts during the first few years,  
86 followed by decreases in later childhood and adolescence, through into adulthood.<sup>3,5</sup>  
87 However, the discrimination accuracies between ASD and typically developing (TD)  
88 individuals reported by a small number of studies to date following machine learning  
89 classification approaches only found modest effects and have not been validated using  
90 independent validation datasets (75-80%<sup>6-7</sup>). Analysis of large fiber tracts connecting many  
91 different brain regions may also obscure changes in altered structural connectivity between  
92 specific brain regions.

93

94 In the current study we have therefore used DTI to identify differences in inter-regional  
95 structural connectivity at the whole-brain level in ASD compared to TD children in 294  
96 different brain regions. We chose to restrict the age range of children to 3-5-6 years old since  
97 this corresponds to the period when ASD symptoms have become robustly established.<sup>8</sup>  
98 Previous tractography-based research also suggests that at this age overall structural  
99 connectivity differences between ASD and TD children may be less pronounced.<sup>4</sup>

100

101 Based on previous studies, we firstly hypothesized that ASD children would exhibit  
102 significantly greater FA in structural connections at the whole brain level and particularly  
103 involving frontal regions compared to TD children. Secondly, we hypothesized that altered  
104 structural connections would be in networks associated with ASD symptoms and cognitive  
105 and behavioral development. Finally, we hypothesized that the structural connectivity  
106 changes identified would accurately predict ASD diagnosis at the individual level not only  
107 within the original discovery dataset but also in two independent validation datasets.

108

## 109 **Methods**

### 110 **Participants**

111 The present study included three independent datasets: a discovery and two validation  
112 datasets.

113

114 **Discovery dataset (Beijing).** The experiment was approved by the ethics committee of the  
115 Peking University Institutional Review Board (approval no. IRB00001052-13079). A total of  
116 119 pre-school children either diagnosed with ASD (n = 93) or TD children (n = 26) were  
117 recruited. The age range of participants was 3-5 to 6 years, which is regarded as the time of  
118 the most severe emerging symptoms of autism.<sup>8</sup> Children with ASD were recruited through  
119 pediatric psychiatric clinics and autism rehabilitation training centers in Beijing. Age and  
120 gender matched TD children were also recruited through online social platforms or day care  
121 centers in Beijing.

122

123 **ASD validation dataset (Chengdu).** The experiment was approved by the ethics committee  
124 of the University of Electronic Science and Technology of China (approval no. 1420190601).  
125 A total of 12 ASD children were recruited aged 3 to 8 years through the child healthcare  
126 department of Chengdu Women's and Children's Central Hospital.

127

128 **TD validation dataset (Nanjing).** The experiment was approved by the medical ethics  
129 committee of the Brain Hospital affiliated to Nanjing Medical University (approval no.  
130 KY043). A total of 9 TD children were recruited aged 4 to 6 years either through the Nanjing  
131 child mental health research center, online social platforms or day care centers.

132

133 All the participants' parents in the three datasets were informed in detail of the research  
134 objectives and procedures, and provided written informed consents. Exclusion criteria were:  
135 (1) neurological complications, such as epilepsy, cerebral palsy, Fragile X syndrome etc.; (2)  
136 medical intervention, such as antipsychotic drugs, transcranial magnetic stimulation,  
137 acupuncture etc.; (3) diagnostic imaging anomalies or craniocerebral trauma; (4) other  
138 contraindications to MRI; (5) TD children had no family histories of any mental disorders  
139 and exhibited no evidence of developmental delay.

140

#### 141 **Clinical Diagnosis**

142 Participants in ASD groups were diagnosed at either Peking University Sixth Hospital or  
143 Beijing Children's Hospital, Beijing, China for Beijing dataset, or at Chengdu Women's and  
144 Children's Central Hospital, Chengdu, China for Chengdu dataset. All children in the ASD

145 group met the diagnostic criteria of Diagnostic and Statistical Manual of Mental Disorders  
146 IV-Text Revision (DSM-IV-TR)<sup>9</sup> or Fifth Edition (DSM-5)<sup>10</sup> and International Statistical  
147 Classification of Diseases and Related Health Problems 10<sup>th</sup> revision (ICD-10)<sup>11</sup>. In addition,  
148 ASD diagnosis was confirmed in the Beijing dataset using the Autism Diagnostic  
149 Observation Schedule (ADOS)<sup>12</sup> Traditional Mandarin version, module 1 or module 2 based  
150 on the child's language ability. For children in the Chengdu dataset, diagnosis was confirmed  
151 using ADOS-2.<sup>13</sup> Moreover, in the Beijing ASD and TD cohorts, cognitive ability was also  
152 assessed using the Gesell Developmental Scale (GDS)<sup>14</sup> administered by an experienced  
153 pediatrician. This is a measure of cognitive and behavioral development and adaptability  
154 including five components (gross motor, fine motor, adaptive, language and personal social  
155 behaviors).

156

### 157 **MRI Acquisition and Preprocessing**

158 Children in both ASD and TD groups of the three datasets were sedated by oral  
159 administration of chloral hydrate at the 50 mg/kg body weight (1 g maximum dose),  
160 commonly used for pediatric clinical imaging. During the MRI scan, children wore earplugs  
161 and de-noising headsets to reduce the noise, and parents were encouraged to remain in the  
162 scanning room to ensure safety in case the child awoke. In all sites, brain images were  
163 reviewed by neuroradiologists to confirm absence of neurological abnormalities.

164

165 For the discovery dataset MRI images were acquired on a GE 3T MR750 scanner with a 12-  
166 channel head coil at the Peking University Third Hospital. DTI data were obtained with an  
167 echo-planar imaging sequence: TR = 9,000 ms, TE = 89.4 ms, FOV = 256 mm, matrix size =  
168 128 × 128, voxel size = 2 mm isotropic, 75 slices covering the whole brain with no gap, 32  
169 diffusion directions, b-value = 1000 s/mm<sup>2</sup>. For independent ASD and TD validation datasets  
170 see supplementary methods. Pre-processing methods for DTI raw data are described in the  
171 supplementary methods.

172

### 173 **Overview of analysis**

174 The flow chart of ASD identification framework is illustrated in Fig. 1. Based on the pre-  
175 processed DTI FA map (Fig. 1(A)), the whole-brain streamline fibers were reconstructed (Fig.  
176 1(B)) and adopted to the brain atlas (Fig. 1(C)). To construct the structural connection matrix  
177 for each subject (Fig. 1(D)), we calculated the pair-wise FA value between every two brain  
178 regions. The constructed structural connection matrix was further projected into the brain for

179 each participant (Fig. 1(E)). Group comparisons were then performed based on all structural  
180 connection networks between ASD and TD groups (Fig. 1(F)) to obtain the between-group  
181 differences (Fig. 1(G)). The resulting connections were finally adopted as features to perform  
182 pattern classification between ASD and TD groups (Fig. 1(H)). The details of each step are  
183 demonstrated in the following sections.

184

### 185 **Construction of Structural Connection Network**

186 The brain atlas used in this study included 294 non-overlapping brain regions consisting of  
187 246 cortical and subcortical regions, 34 cerebellar regions, and 14 brainstem regions (Fig.  
188 1(C)). The cortical and subcortical regions were from the Brainnetome Atlas<sup>15</sup> with 123  
189 homotopic regions in each hemisphere; cerebellar regions were from the Human Cerebellar  
190 Probabilistic Magnetic Resonance Atlas<sup>16</sup> and brainstem regions were from the Human  
191 Brainstem Standard Neuroanatomy Atlas<sup>17</sup>. Since the three atlases were originally defined in  
192 the adult MNI152 standard space, we first performed linear registration to warp the T1-  
193 weighted adult MNI152 image to the space of T1-weighted template image of children aged  
194 4-5-8-5 years ([https://www.mcgill.ca/bic/software/tools-data-analysis/anatomical-](https://www.mcgill.ca/bic/software/tools-data-analysis/anatomical-mri/atlases/nihpd)  
195 [mri/atlases/nihpd](https://www.mcgill.ca/bic/software/tools-data-analysis/anatomical-mri/atlases/nihpd)),<sup>18</sup> and then applied the linear transformation to the brain atlas to warp it to  
196 the children's template image space as well in order to obtain the young children's brain atlas.

197

198 The reconstructed whole-brain streamline fibers in each child (Fig. 1(B)) were then aligned to  
199 the young children's brain atlas space via DSI Studio<sup>19</sup>. The structural connection matrix for  
200 each child (Fig. 1(D)) was obtained by calculating the pair-wise mean FA value between  
201 every two brain regions via DSI Studio<sup>19</sup>, and further represented as a structural connection  
202 network (Fig. 1(E)) in which the nodes were the brain regions and edges were the mean FA  
203 values between two nodes.

204

### 205 **Identification of Structural Connections Showing Differences between ASD and TD**

206 Based on the structural connection networks of all children in the ASD and TD groups (Fig.  
207 1(F)), we adopted the widely used Network-based Statistic (NBS) approach<sup>20</sup> to identify the  
208 structural connections and associated networks showing between-group differences (Fig.  
209 1(G)). As a non-parametric statistical method, NBS first performs a large number of  
210 univariate hypothesis tests on all edges in the network, then clustering-based statistics, and  
211 finally permutation tests to calculate the family-wise error rate (FWER) corrected *p*-values  
212 for each sub-network consisting of edges with group differences. We adopted the NBS

213 Connectome toolbox implemented in Matlab<sup>20</sup> to perform the analysis. The structural  
214 connection networks of all participants in ASD and TD groups were the inputs with gender  
215 and age as covariates. Next we performed the NBS analysis to identify both increased and  
216 decreased FA values of structural connections and associated networks in ASD compared to  
217 TD.

218

### 219 **Pattern Classification between ASD and TD Children**

220 Based on the identified structural connections showing between-group differences (Fig. 1(G)),  
221 we further adopted FA values of those connections as features to perform pattern  
222 classification between the ASD and TD groups. We used the discovery dataset as the training  
223 dataset to establish the classification model. For training and leave-one-out cross-validation,  
224 we employed the widely used support vector machine (SVM) approach. The training model  
225 was then applied to the two independent validation datasets to validate its generalizability.  
226 Specifically, we adopted the widely used cost-support vector classification (C-SVC), and  
227 the radial basis function (RBF) as the kernel function in SVM. The optimal values of  
228 parameters  $c$  (i.e., cost,  $c$  ranged from 15 to 16) and  $g$  (i.e., gamma,  $g$  ranged from 0.08  
229 to 1) in RBF were obtained by a hyperparameter optimization framework of optuna.<sup>21</sup>

230

### 231 **Potential Effect of Imbalanced Sample Size between ASD and TD**

232 In view of the imbalanced group sample sizes in the discovery dataset (93 ASD and 26 TD),  
233 we adopted both up-sampling and down-sampling approaches to alleviate the potential model  
234 overfitting as well as classification bias problem (see supplementary methods). Both  
235 approaches confirmed that our classification model was not influenced by the imbalanced  
236 sample sizes.

237

### 238 **Statistical Analysis**

239 Independent two-sample  $t$ -tests were utilized to identify the different structural connections  
240 between ASD and TD ( $n=10,000$  permutation times, significance level  $p<0.05$ , FWE  
241 corrected) in NBS. Independent sample  $t$ -tests were used for continuous variables including  
242 age, BMI, head circumference, GDS total score, and FA between ASD and TD. Chi-square  
243 tests were used for categorical variables including gender and handedness between ASD and  
244 TD. Pearson's linear correlation coefficients were computed between the averaged FA value  
245 and ADOS and GDS scores (one-sample  $t$ -tests, significance level at  $p<0.05$ , FDR corrected).  
246 A mediation model was conducted (PROCESS)<sup>22</sup> using bootstrap analysis to investigate the



247 relationship between the averaged FA value, ADOS total and GDS total scores (bootstrap =  
248 1000).

249

## 250 **Results**

### 251 **Subject Demographics and Behavioral Measures**

252 Table 1 summarizes demographic and other information for ASD and TD groups in the  
253 different datasets and ADOS scores for ASD children. There were no group differences in  
254 age, gender, BMI, handedness, and head circumference in the discovery dataset, although as  
255 expected the total GDS score was significantly less in the ASD group indicating impaired  
256 cognitive and behavioral development.

257

### 258 **Increased FA Connections and Networks in ASD Compared to TD Children**

259 We identified 33 increased but no decreased FA values of structural connections in ASD  
260 compared to TD children (Figs. 2(A) and 2(C), Table 2). Notably, 29 out of 33 connections  
261 were associated with the frontal lobe. Moreover, 30 out of 33 connections were intra-  
262 hemispheric. Fig. 2(B) illustrates the locations of 33 connections on the cortical surface. In  
263 the ASD group averaged FA values were significantly negatively correlated (FDR corrected)  
264 with ADOS total and ‘social interaction’ sub-scale scores (Fig. 2(D)) and positively  
265 correlated with the GDS total score (Fig. 2(E)). In the TD group there was a slight but not  
266 significant negative correlation between averaged FA values and GDS score (Fig. 2(E)). A  
267 mediation analysis indicated that within the ASD group the ADOS total score was the main  
268 mediator of the effects on the averaged FA value and GDS total score (Fig. 2(F)).

269

270 Connections with increased FA were further categorized into 5 structural networks via NBS  
271 (Fig. 2(G) and Table 2) together with a functional characterization using the Neurosynth  
272 platform, and visualized as a word cloud. Network 1: default mode function and memory  
273 retrieval, including: left superior temporal gyrus, precuneus, inferior parietal lobule, superior  
274 frontal gyrus, and medioventral occipital cortex; Network 2: motor function, including: right  
275 superior and inferior frontal gyri, right cerebellum lobe IX and left postcentral gyrus;  
276 Network 3 visual and facial recognition function, including: right inferior and superior frontal  
277 gyri, lateral occipital cortex, pre-motor thalamus, middle frontal gyrus, medioventral occipital  
278 cortex, basal ganglia, superior temporal gyrus and insula; Network 4 language and cognitive  
279 function, including: left middle and inferior frontal gyri, thalamus, cingulate gyrus, basal

280 ganglia and cerebellum lobe IX; Network 5: social and general reward functions, including:  
281 bilateral orbitofrontal and cingulate gyri and basal ganglia.

282

### 283 **Classification Accuracy between ASD and TD Children**

284 We first up-sampled the discovery dataset to 186 subjects with 93 ASD and 93 TD and  
285 trained the classification model in a 33-dimensional feature space based on the 33  
286 connections using a leave-one-out cross-validation strategy. Fig. 3(A) shows the  
287 classification model in a 3-dimensional feature space after performing dimensionality  
288 reduction using the t-distributed stochastic neighbor embedding (t-SNE) algorithm.<sup>23</sup> The  
289 Receiver Operating Characteristic (ROC) curve of the training model is shown in Fig. 3(B).  
290 The area under the ROC curve (AUC) was 0.981, indicating the robustness of the training  
291 model. The confusion matrix of the training model is shown in Fig. 3(C). Accuracy,  
292 sensitivity, specificity, precision, and F measure in both discovery and validation datasets are  
293 reported in Fig. 3(D) with the proposed model achieving high classification accuracy in both  
294 discovery (96.77%) and independent validation datasets (91.67% and 88.89%). The  
295 alternative down-sampling strategy of the discovery dataset by 1,000 times also achieved  
296 high classification accuracy in both discovery (94.85±1.30%) and independent validation  
297 datasets (91.63±5.55% and 80.04±5.52%). Thus overall, the classification model showed  
298 both high accuracy and generalizability for ASD identification across different datasets  
299 without being influenced by the imbalanced sample sizes of the discovery dataset.

300

### 301 **Discussion**

302 Our findings have revealed the presence of a small number of inter-regional structural  
303 connections within the brains of young children with ASD which exhibit increased FA  
304 compared to TD and negatively associated with symptom severity. The majority of affected  
305 regional connections involve the frontal cortex and overall they achieved a classification  
306 accuracy of 96.77% for discriminating between ASD and TD individuals in the discovery  
307 dataset and 91.67% and 88.89% in two small independent datasets. The 33 inter-regional  
308 structural connections could be clustered into 5 independent networks with relevance to a  
309 range of behavioral functions influenced in ASD.

310

311 In support of our original hypothesis, the majority of the 33 structural connections showing  
312 increased FA in children with ASD in the current study involved the frontal lobe including

313 intrinsic short range frontal-frontal connections and longer range frontal-occipital, frontal-  
314 thalamic and frontal-limbic ones. This is in agreement with findings from other studies<sup>3-4,24-26</sup>  
315 and supports the conclusion that alterations in both intrinsic and extrinsic frontal lobe  
316 structural connectivity contribute fundamentally to ASD.

317

318 The altered structural connections in children with ASD could be clustered into 5 individual  
319 networks encompassing default mode, motor, visual and facial recognition, language and  
320 memory and reward functions. The largest single frontal lobe cluster involved orbitofrontal  
321 regions and their connections with the basal ganglia. These intrinsic frontal connections are  
322 strongly associated with social and other types of reward processing as well as decision  
323 making<sup>27</sup> and these functions are known to be impaired in ASD.<sup>28-29</sup> Three other clusters  
324 involved inferior, medial and superior frontal gyri connections with thalamus, basal ganglia,  
325 cingulate, insula, occipital cortex, post-central gyrus and cerebellum associated with social  
326 cognition, language comprehension, sensory and motor processing functions,<sup>30-32</sup> all of which  
327 are impaired in ASD.<sup>33-36</sup> The remaining cluster primarily involved connections between the  
328 superior temporal gyrus and inferior parietal lobule with the precuneus in the default mode  
329 network, associated with self-processing, experience of agency, autobiographic and episodic  
330 memory retrieval and visuospatial imagery. Default mode dysfunction has been consistently  
331 reported in ASD<sup>37</sup> as well as impaired self-processing, sense of agency, autobiographical and  
332 episodic memory.<sup>38-39</sup>

333

334 A previous study using DTI measures and classification techniques to identify ASD  
335 compared to TD children employed shape representations of white matter fiber tracts as  
336 features, and achieved 75.34% discrimination accuracy using a leave-one-out cross-validation  
337 approach.<sup>7</sup> Another study adopted the anisotropy scores of regions of interest as features, and  
338 achieved 80% accuracy using leave-one-out cross-validation.<sup>6</sup> In our current study, we  
339 adopted the DTI-derived FA values of structural connections as features, and achieved a  
340 much higher classification accuracy in both the discovery dataset (96.77%) and, importantly,  
341 in independent validation datasets (91.67% and 88.89%), demonstrating satisfying  
342 classification and generalization ability of our model across different datasets.

343

344 Unexpectedly, we found a significant negative correlation between the averaged FA values of  
345 the 33 altered connections in children with ASD and ADOS total and social sub-scale scores,  
346 indicating that symptom severity was actually lower in children with greater FA. Scores on

347 GDS were also positively correlated with FA values in the ASD group but slightly negatively  
348 correlated in the TD group. A mediation analysis identified that ADOS scores were primarily  
349 mediating both FA values and GDS scores in the ASD group. This may indicate an  
350 experience-dependent compensatory effect is occurring in children with ASD whereby  
351 increased FA contributes to reduced symptom severity and enhanced cognitive and  
352 behavioral development. A social experience compensation effect has previously been  
353 described in behavioral studies of autism.<sup>40</sup> Interestingly, a tractography study has reported a  
354 positive association between increased frontal lobe FA and symptom severity in very young  
355 children but a negative one in older children in the age-range of the current study.<sup>4</sup> Thus,  
356 children who experience more severe symptoms at the age of 3.5-6 years may have reduced  
357 FA in these neural circuits compared to when they were younger, whereas those with milder  
358 symptoms may instead have maintained or even increased their FA. A longitudinal study  
359 would clearly be required to confirm this possibility.

360

## 361 **Limitations**

362 A limitation of the current study is its cross-sectional nature and restricted age range (3-5-6  
363 years old). Patterns of structural differences may differ in both younger and older individuals  
364 and only a longitudinal design study can address this. A second limitation is we did not  
365 determine whether observed changes are specific to ASD or might also occur in children with  
366 developmental delay, for example. A final limitation is that we could only obtain two small  
367 datasets for independent analysis of discrimination accuracy although the findings were very  
368 encouraging.

369

## 370 **Conclusion**

371 By employing a fine-grained, brain-wide analysis of structural differences for regional  
372 connections in the brains of young (3-5-6 years old) autistic compared with typically  
373 developing children we have identified a number of structural connections mainly involving  
374 the frontal lobe exhibiting increased FA but negatively associated with symptom severity.  
375 Differences in these structural connections show high accuracy (>96%) in discriminating  
376 autistic children from TD children which generalizes to independent novel datasets. These  
377 new findings suggest that differences in structural connections primarily involving the frontal  
378 cortex of young autistic children are a potential reliable and generalizable biomarker for ASD  
379 diagnosis and for assessing the efficacy of therapeutic interventions.

380

## 381 **Contributors**

382 XJ: conceptualization, methodology, software, validation, formal analysis, resources, data  
383 curation, writing - original draft, writing - review & editing, visualization, supervision,  
384 project administration, funding acquisition. XJS: methodology, validation, investigation,  
385 resources, data curation, writing – review & editing, project administration, funding  
386 acquisition. ZBZ: methodology, software, validation, formal analysis, visualization. FCM:  
387 investigation. JL: investigation. TJS: investigation. XJX: investigation. XYK: resources.  
388 YZC: formal analysis, visualization. XEC: investigation. WHZ: methodology, formal  
389 analysis. JK: investigation. RH: investigation. YL: investigation. HSY: resources. YX:  
390 investigation. JSH: conceptualization, resources. SPH: investigation. YL: investigation. HL:  
391 conceptualization. LZ: conceptualization. MXJ: investigation. JL: resources. KMK:  
392 conceptualization, formal analysis, resources, writing - review & editing, visualization,  
393 supervision, project administration, funding acquisition. RZ: conceptualization, resources,  
394 writing - review & editing, visualization, supervision, project administration, funding  
395 acquisition.

## 396 **Declaration of interests**

397 We declare no competing interests.

## 398 **Data sharing**

399 Individual participant data and the data dictionary defining each field in the set will not be  
400 made available as all participants did not consent to have their data as a public resource. The  
401 group-level data results as well as the data processing code which do not disclose the  
402 participants' information will be available with publication from the corresponding authors  
403 (KMK and RZ) on reasonable request (including a research proposal), subject to review.

## 404 **Acknowledgments**

405 This work was supported by Key Technological Projects of Guangdong Province (grant  
406 number 2018B030335001 - KMK), Beijing Municipal Science & Technology Commission  
407 (grant number Z181100001518005 - RZ), the National Key Research and Development  
408 Program of China (2016YFC0105501 - RZ), Sichuan Science and Technology Program  
409 (2021YJ0247 - XJ), National Natural Science Foundation of China (61976045 - XJ,  
410 81801779 - SXJ). The funders played no role in the writing of the manuscript or the decision  
411 where to submit it for publication. Furthermore, the authors would like to thank Dr. Ruo-Yan  
412 Zhao for her GDS assessment. We appreciate Ms. Qing-Yun Wei of Sunshine Friendship  
413 Rehabilitation Center, Beijing, China, and Ms. Meng-Lin Sun of Wucailu Rehabilitation  
414 Center, Beijing, China, for their cooperation of children recruitment. Finally, we are grateful  
415 to all the participant children and their families.

## 416 **References**

- 417 1. Hazlett HC, Poe MD, Gerig G, Styner M, Chappell C, Smith RG, Vachet C, Piven J.  
418 Early brain overgrowth in autism associated with an increase in cortical surface area  
419 before age 2 years. *Arch Gen Psychiatry*. 2011; **68(5)**:467-76.
- 420 2. Girault JB, Piven J. The neurodevelopment of autism from infancy through toddlerhood.  
421 *Neuroimaging Clinical*. 2020; **30(1)**:97-114.
- 422 3. Catani M, DA Flavio, B Sanja, H Henrietta, TS Michel, et al. Frontal networks in  
423 adults with autism spectrum disorder. *Brain*. 2016; **139(2)**:616-30.
- 424 4. Solso S, Xu R, Proudfoot J, et al. Diffusion tensor imaging provides evidence of  
425 possible axonal overconnectivity in frontal lobes in autism spectrum disorder toddlers.  
426 *Biological Psychiatry*. 2016; **79(8)**: 676-684.
- 427 5. Walker L, Gozzi M, Lenroot R, et al. Diffusion tensor imaging in young children with  
428 autism: biological effects and potential confounds. *Biological Psychiatry*. 2012; **72**:  
429 1043-51.
- 430 6. Ingalhalikar M, Parker D, Bloy L, et al. Diffusion based abnormality markers of  
431 pathology: toward learned diagnostic prediction of ASD. *Neuroimage*. 2011;  
432 **57(3)**:918-27.
- 433 7. Adluru N, Hinrichs C, Chung MK, et al. Classification in DTI using shapes of white  
434 matter tracts. 2009 Annual International Conference of the IEEE Engineering in  
435 Medicine and Biology Society. 2009 Sept 3-6; Minneapolis, MN, USA: IEEE; 2009  
436 Nov. 2719 p.
- 437 8. Lord C, Elsabbagh M, Baird G, Veenstra-Vanderweele J. Autism spectrum disorder.  
438 *Lancet*. 2018 Aug; **392(10146)**:508-20.
- 439 9. American Psychiatric Association. Diagnostic and statistical manual of mental  
440 disorders: DSM-4. 4th edn. American Psychiantric Publishing; 2000.

- 441 10. American Psychiatric Association. Diagnostic and statistical manual of mental  
442 disorders: DSM-5. 5th edn. American Psychiatric Publishing; 2013.
- 443 11. World Health Organization. International statistical classification of diseases and  
444 related health problems. 10th revision, 2nd edn. World Health Organization; 2004.
- 445 12. Lord C, Rutter M, Goode S, et al. Autism diagnostic observation schedule: a  
446 standardized observation of communicative and social behavior. *Journal of Autism and*  
447 *Developmental Disorders*. 1989; **19(2)**:185-212.
- 448 13. Lord C, Rutter M, Pamela C, et al. ADOS: Autism diagnostic observation schedule.  
449 Boston, MA: Hogrefe; 2008.
- 450 14. Jin X, Sun Y, Jiang F, et al. "Care for Development" intervention in rural China: a  
451 prospective follow-up study. *Journal of Developmental Behavior and Pediatrics*. 2007;  
452 **28(3)**:213-8.
- 453 15. Fan L, Li H, Zhuo J. The human brainnetome atlas: a new brain atlas based on  
454 connectional architecture. *Cerebral Cortex*. 2016; **26(8)**:3508-26.
- 455 16. Diedrichsen J, Balsters JH, Flavell J, et al. A probabilistic MR atlas of the human  
456 cerebellum. *Neuroimage*. 2009; **46(1)**:39-46.
- 457 17. Edlow BL, Takahashi E, Wu O, et al. Neuroanatomic connectivity of the human  
458 ascending arousal system critical to consciousness and its disorders. *Journal of*  
459 *Neuropathology & Experimental Neurology*. 2012; **71(6)**:531-46.
- 460 18. Fonov V, Evans AC, Botteron K, Almlí CR, McKinstry RC, Collins DL, & Brain  
461 Development Cooperative Group. Unbiased average age-appropriate atlases for  
462 pediatric studies. *NeuroImage*. 2011; **54(1)**:313-27.
- 463 19. Yeh FC, Verstynen TD, Wang Y, Fernández-Miranda JC, Tseng WYI. Deterministic  
464 diffusion fiber tracking improved by quantitative anisotropy. *PloS One*. 2013; **8(11)**:  
465 e80713.



- 466 20. Zalesky A, Fornito A, Bullmore ET. Network-based statistic: Identifying differences in  
467 brain networks. *NeuroImage*. 2010; **53(4)**:1197-207.
- 468 21. Akiba T, Sano S, Yanase T, Ohta T, Koyama Masanori. Optuna: A next-generation  
469 hyperparameter optimization framework. Proceedings of the 25th ACM SIGKDD  
470 international conference on knowledge discovery & data mining; Anchorage AK USA,  
471 NY USA: Association for Computing Machinery; 2019 Aug. 2623 p.
- 472 22. Hayes AF. PROCESS: A versatile computational tool for observed variable mediation,  
473 moderation, and conditional process modeling. 2012; Retrieved from  
474 <https://www.afhayes.com/public/process2012.pdf>
- 475 23. Laurens VDM, Hinton G. Visualizing Data using t-SNE. *Journal of Machine Learning*  
476 *Research*. 2008; **9(2605)**:2579-605.
- 477 24. Casanova MF. The neuropathology of autism. *Brain pathology*. 2007; **17(4)**:422-33.
- 478 25. Middleton FA, Strick PL. Cerebellar projections to the prefrontal cortex of the primate.  
479 *Journal of Neuroscience*. 2001; **21(2)**:700-12.
- 480 26. Johnson B, Stanley-Cary C, Fielding J, et al. *Cerebellum and the Psychopathology of*  
481 *Autism and Asperger's Disorder*. New York: Springer; 2014. 845 p.
- 482 27. Kringelbach ML. The human orbitofrontal cortex: linking reward to hedonic experience.  
483 *Nature Reviews Neuroscience*. 2005; **6**:691-702.
- 484 28. Jin P, Wang Y, Li Y, *et al*. The fair decision-making of children and adolescents with  
485 high-functioning autism spectrum disorder from the perspective of dual-process  
486 theories. *BMC Psychiatry*. 2020 Apr 6; **20(1)**:152.
- 487 29. Scott-Van Zeeland AA, Dapretto M, Ghahremani DG, et al. Reward processing in  
488 autism. *Autism Research*. 2010; **3(2)**:53-67.
- 489 30. Badre D, Nee DE. Frontal cortex and the hierarchical control of behavior. *Trends in*  
490 *Cognitive Science*. 2018; **22(2)**:170-88.

- 491 31. Fuster JM. The prefrontal cortex – an update: Time is of the essence. *Neuron*. 2011;  
492 **30**:319-33.
- 493 32. Turken AU, Dronkers NF. The neural architecture of the language comprehension  
494 network: converging evidence from lesion and connectivity analyses. *Front Syst*  
495 *Neurosci*. 2011;**1**.
- 496 33. Harrison, L.A., Kats, A., Kilroy, E. et al. Motor and sensory features successfully  
497 decode autism spectrum disorder and combine with the original RDoC framework to  
498 boost diagnostic classification. *Scientific Reports*. 2021; **11**:7839.
- 499 34. Kjellmer L, Hedvall A, Holm A, et al. Language comprehension in preschoolers with  
500 autism spectrum disorders without intellectual disability: Use of the Reynell  
501 Developmental Language Scales. *Research in Autism Spectrum Disorders*. 2012; **6(3)**:  
502 1119-25.
- 503 35. Vlamings P, Jonkman LM, Daalen EV, et al. Basic abnormalities in visual processing  
504 affect face processing at an early age in autism spectrum disorder. *Biological*  
505 *Psychiatry*. 2010; **68(12)**:1107-13.
- 506 36. Yi HL, Licari M, Spittle AJ, et al. Early motor function of children with autism  
507 spectrum disorder: A systematic review. *Pediatrics*. 2021; **147(2)**:e2020011270.
- 508 37. Lynch CJ, Uddin LQ, Supekar K, et al. Default mode network in childhood autism:  
509 posteromedial cortex heterogeneity and relationship with social deficits. *Biological*  
510 *Psychiatry*. 2013; **74(3)**:212-9.
- 511 38. Souchay C, Ohlsson M, Zalla T. Autobiographical memory and theory of mind in  
512 autism spectrum disorder. Atrium: WILEY Blackwell; 2018. 92 p. (Johnson JL,  
513 Goodman GS, Mundy PC. *The Wiley handbook of memory, autism spectrum disorder,*  
514 *and the law*; vol. 5).

- 515 39. Zhao W, Luo L, Li Q, Kendrick KM. What can psychiatric disorders tell us about  
516 neural processing of the self. *Front Hum Neurosci.* 2013; **7**:485.
- 517 40. Livingston LA, Shah P, Milner V, et al. Quantifying compensatory strategies in adults  
518 with and without diagnosed autism. *Molecular Autism.* 2020; **11**:15.
- 519

520 **Table 1.** Subject demographics and behavioral measures of the three datasets.

|                                                                         | TD |              |  | ASD |              | Statistics<br>( <i>t</i> or $\chi^2$ ) | Significance<br>( <i>p</i> ) |
|-------------------------------------------------------------------------|----|--------------|--|-----|--------------|----------------------------------------|------------------------------|
|                                                                         | N  | Mean (SD)    |  | N   | Mean (SD)    |                                        |                              |
| <b>Discovery (Beijing) dataset</b>                                      |    |              |  |     |              |                                        |                              |
| Age, years                                                              | 26 | 4.70 (0.46)  |  | 93  | 4.58 (0.55)  | -1.07 <sup>a</sup>                     | 0.29                         |
| Gender (boys: girls)                                                    | 26 | 20:6         |  | 93  | 85:8         | 2.83 <sup>b</sup>                      | 0.09                         |
| BMI                                                                     | 26 | 15.64 (1.68) |  | 76  | 16.03 (1.77) | 0.87 <sup>a</sup>                      | 0.39                         |
| Handedness (R: D: L)                                                    | 26 | 20:6:0       |  | 90  | 78:9:3       | 3.76 <sup>b</sup>                      | 0.15                         |
| Head Circumference, cm                                                  | 26 | 51.24 (1.48) |  | 90  | 51.79 (1.72) | 1.49 <sup>a</sup>                      | 0.14                         |
| ADOS social interaction sub-scale score                                 | .. | ..           |  | 86  | 9.88 (2.54)  | ..                                     | ..                           |
| ADOS communication sub-scale score                                      | .. | ..           |  | 86  | 5.57 (1.87)  | ..                                     | ..                           |
| ADOS total score (social interaction + communication)                   | .. | ..           |  | 86  | 15.45 (4.02) | ..                                     | ..                           |
| GDS total score                                                         | 26 | 94.39 (10.1) |  | 82  | 64.34 (17.1) | 8.50 <sup>a</sup>                      | <0.001                       |
| <b>ASD validation (Chengdu) dataset</b>                                 |    |              |  |     |              |                                        |                              |
| Age, years                                                              | .. | ..           |  | 12  | 4.98 (1.22)  | ..                                     | ..                           |
| Gender (boys: girls)                                                    | .. | ..           |  | 12  | 11:1         | ..                                     | ..                           |
| ADOS-2 total score (social affect + restricted and repetitive behavior) | .. | ..           |  | 12  | 18.58 (4.46) | ..                                     | ..                           |
| <b>TD validation (Nanjing) dataset</b>                                  |    |              |  |     |              |                                        |                              |
| Age, years                                                              | 9  | 5.44 (0.84)  |  | ..  | ..           | ..                                     | ..                           |
| Gender (boys: girls)                                                    | 9  | 6:3          |  | ..  | ..           | ..                                     | ..                           |

521 TD: typically developing; ASD: autism spectrum disorder; BMI: body mass index; R: right handed; D:

522 double handed; L: left handed; ADOS: Autism Diagnostic Observation Schedule; ADOS-2:

523 Second Edition of ADOS; GDS: Gesell Developmental Scale; <sup>a</sup>Independent two-sample *t* test, *t*

524 score; <sup>b</sup>Chi-square test,  $\chi^2$ . SD: standard deviations.

525

526 **Table 2.** Profiles of the 33 structural connections with increased FA in children with ASD.

| No. | Network | Region name | MNI coordinates |     |       | Region name | MNI coordinates |     |     |
|-----|---------|-------------|-----------------|-----|-------|-------------|-----------------|-----|-----|
|     |         |             | X               | Y   | Z     |             | X               | Y   | Z   |
| 1   | 1       | STG_L       | -55             | -3  | -10   | PCun_L      | -12             | -67 | 25  |
| 2   |         | IPL_L       | -47             | -65 | 26    | PCun_L      | -12             | -67 | 25  |
| 3   |         | SFG_L       | -18             | 24  | 53    | MVOcC_L     | -13             | -68 | 12  |
| 4   |         | STG_L       | -55             | -3  | -10   | MVOcC_L     | -13             | -68 | 12  |
| 5   | 2       | SFG_R       | 20              | 4   | 64    | IFG_R       | 45              | 16  | 25  |
| 6   |         | SFG_R       | 20              | 4   | 64    | PoG_L       | -21             | -35 | 68  |
| 7   |         | SFG_R       | 20              | 4   | 64    | Right_IX    | 6               | -54 | -50 |
| 8   | 3       | IFG_R       | 48              | 35  | 13    | LOcC_R      | 32              | -85 | -12 |
| 9   |         | IFG_R       | 54              | 24  | 12    | LOcC_R      | 32              | -85 | -12 |
| 10  |         | MFG_R       | 42              | 44  | 14    | MVOcC_R     | 10              | -85 | -9  |
| 11  |         | IFG_R       | 48              | 35  | 13    | MVOcC_R     | 10              | -85 | -9  |
| 12  |         | IFG_R       | 51              | 36  | -1    | MVOcC_R     | 10              | -85 | -9  |
| 13  |         | IFG_R       | 51              | 36  | -1    | BG_R        | 22              | 8   | -1  |
| 14  |         | IFG_R       | 51              | 36  | -1    | BG_R        | 14              | 5   | 14  |
| 15  |         | IFG_R       | 48              | 35  | 13    | STG_R       | 47              | 12  | -20 |
| 16  |         | IFG_R       | 54              | 24  | 12    | INS_R       | 36              | 18  | 1   |
| 17  |         | SFG_R       | 7               | -4  | 60    | Tha_R       | 12              | -14 | 1   |
| 18  | IFG_R   | 48          | 35              | 13  | Tha_R | 12          | -14             | 1   |     |
| 19  | 4       | MFG_L       | -41             | 41  | 16    | BG_L        | -14             | 2   | 16  |
| 20  |         | MFG_L       | -41             | 41  | 16    | Tha_L       | -7              | -12 | 5   |
| 21  |         | IFG_L       | -53             | 23  | 11    | BG_L        | -14             | 2   | 16  |
| 22  |         | MFG_L       | -41             | 41  | 16    | CG_R        | 5               | 41  | 6   |
| 23  |         | MFG_L       | -26             | 60  | -6    | Tha_L       | -7              | -12 | 5   |
| 24  |         | Tha_L       | -7              | -12 | 5     | Left_IX     | -8              | -54 | -48 |
| 25  | 5       | OrG_R       | 23              | 36  | -18   | OrG_R       | 6               | 57  | -16 |
| 26  |         | OrG_R       | 23              | 36  | -18   | OrG_R       | 9               | 20  | -19 |
| 27  |         | OrG_L       | -6              | 52  | -19   | OrG_L       | -10             | 18  | -19 |
| 28  |         | OrG_R       | 6               | 47  | -7    | OrG_R       | 9               | 20  | -19 |
| 29  |         | OrG_L       | -7              | 54  | -7    | CG_L        | -4              | 39  | -2  |
| 30  |         | OrG_R       | 6               | 47  | -7    | CG_L        | -4              | 39  | -2  |
| 31  |         | OrG_L       | -10             | 18  | -19   | CG_L        | -4              | 39  | -2  |
| 32  |         | OrG_R       | 6               | 47  | -7    | BG_R        | 15              | 14  | -2  |
| 33  |         | OrG_R       | 6               | 57  | -16   | BG_R        | 15              | 14  | -2  |

527 Abbreviations: L, left; R, right; STG, superior temporal gyrus; PCun, precuneus; IPL, inferior parietal

528 lobule; SFG, superior frontal gyrus; MVOcC, medioventral occipital cortex; IFG, inferior frontal

529 gyrus; PoG, postcentral gyrus; LOcC, lateral occipital cortex; Tha, thalamus; MFG, middle

530 frontal gyrus; OrG, orbitofrontal gyrus; CG, cingulate gyrus; BG, basal ganglia; INS, insula.

531

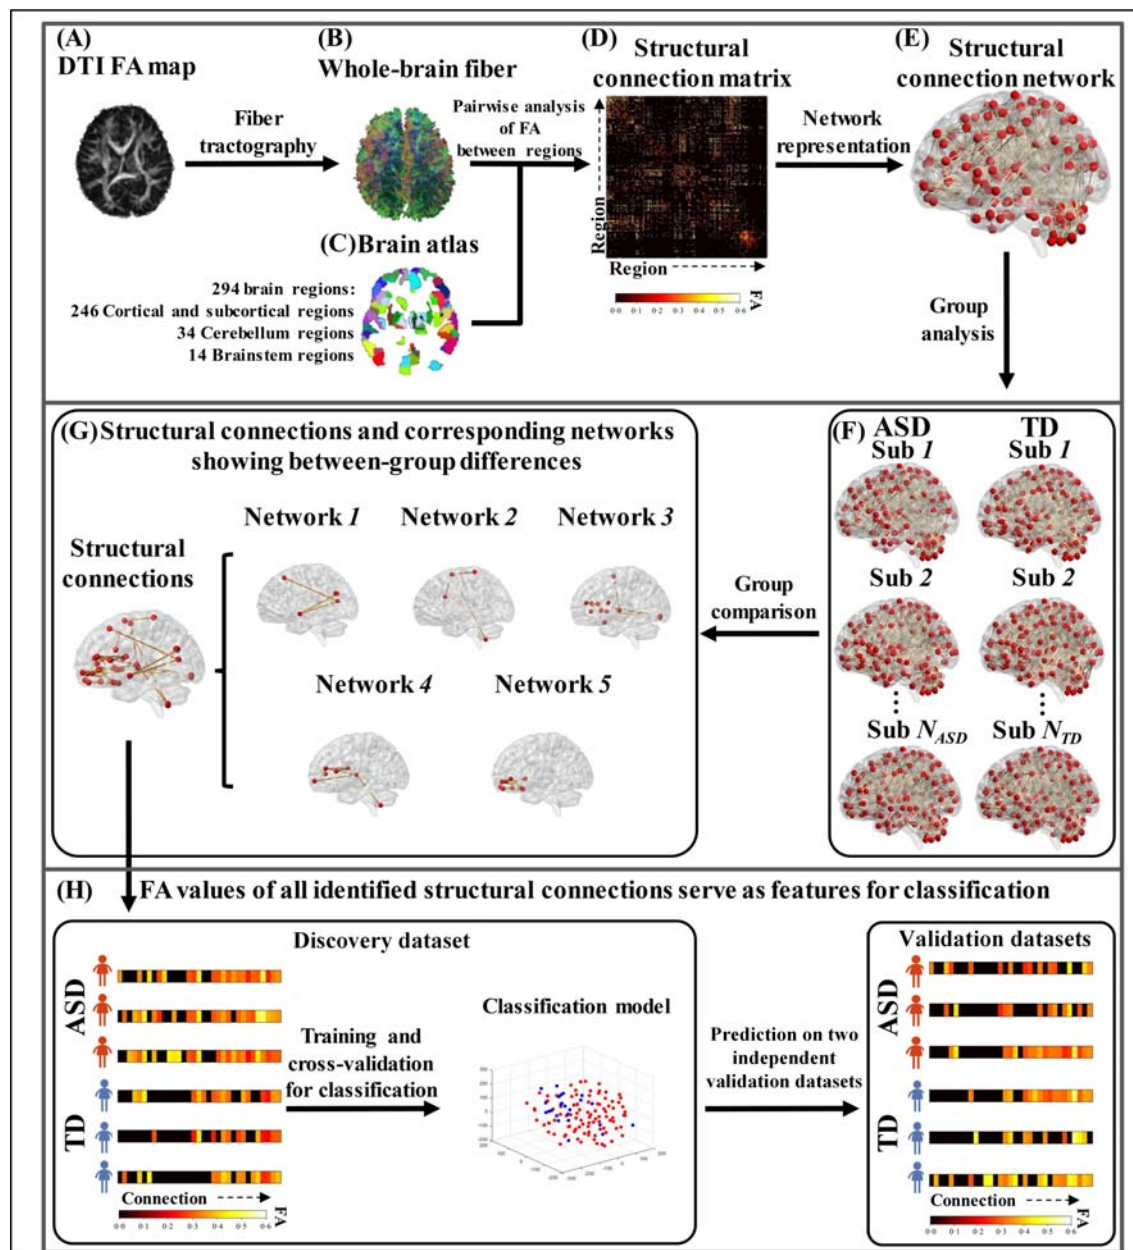

532

533

**Figure 1 Flow chart of ASD identification framework. (A)** The pre-processed DTI FA map. **(B)**

534

Reconstructed whole-brain streamline fibers. **(C)** Young children's brain atlas. **(D)** Structural

535

connection matrix for each participant. **(E)** The individual structural connection network. **(F)** All

536

individual structural connection networks in ASD and TD groups. **(G)** The structural connections and

537

associated networks showing differences between ASD and TD groups. **(H)** Pattern classification

538

between ASD and TD using all structural connections showing between-group differences.

539

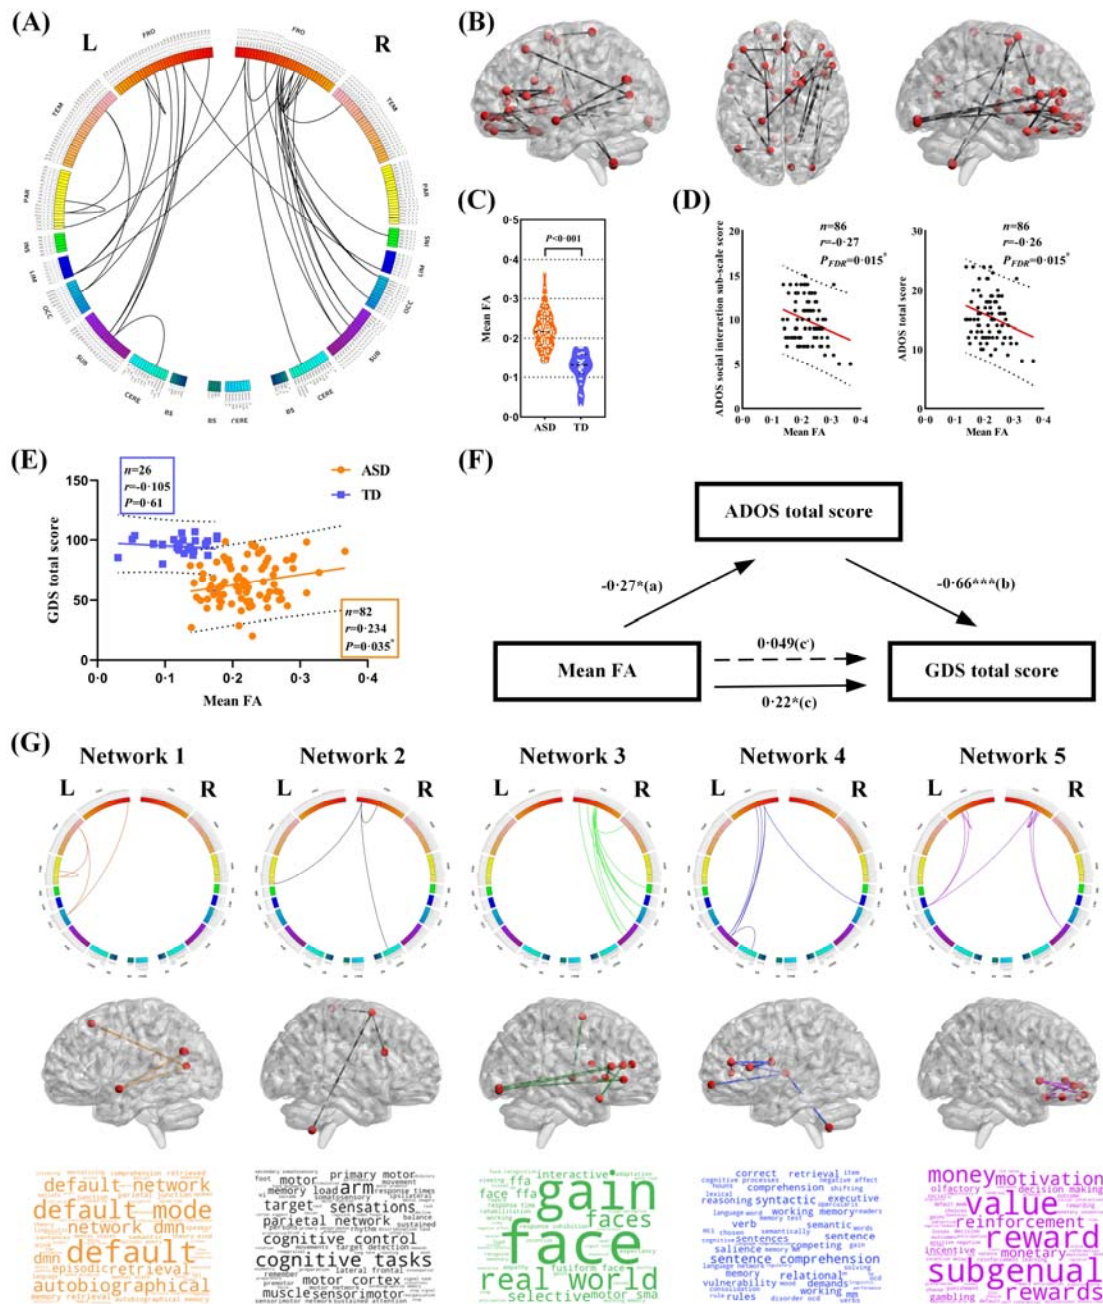

540

541 **Figure 2 Increased FA connections and networks in ASD compared to TD children.** (A) The 33  
 542 increased FA values of structural connections in ASD in circos plot. Abbreviations: L, left hemisphere;  
 543 R, right hemisphere; FRO, frontal lobe; TEM, temporal lobe; PAR, parietal lobe; INS, insular lobe;  
 544 LIM, limbic lobe; OCC, occipital lobe; SUB, subcortical nuclei; CERE, cerebellum; BS, brain stem.  
 545 (B) Locations of 33 connections on the cortical surface. (C) Averaged FA value of 33 connections in  
 546 ASD and TD groups. (D) Correlations between averaged FA value of the 33 connections in ASD and  
 547 ADOS ‘social interaction’ sub-scale score and total (‘communication’ + ‘social interaction’) score. (E)  
 548 Correlations between averaged FA value of the 33 connections and ADOS social communication and  
 549 total scores and GDS total score. (F) Mediation analysis between averaged FA, GDS total score and

550 ADOS total score (path  $a=-0.27$ ,  $p=0.018$ ; path  $b=-0.66$ ,  $p<0.001$ ; path  $c=0.22$ ,  $p=0.047$ ; path  
551  $c'=0.049$ ,  $p=0.58$ ). (G) The 33 increased connections were further categorized into 5 structural  
552 networks. In each network, row 1-3 shows the structural connections in circo plot, locations of the  
553 connections on cortical surface, and the word cloud of functional annotation via meta-analysis  
554 respectively.  
555



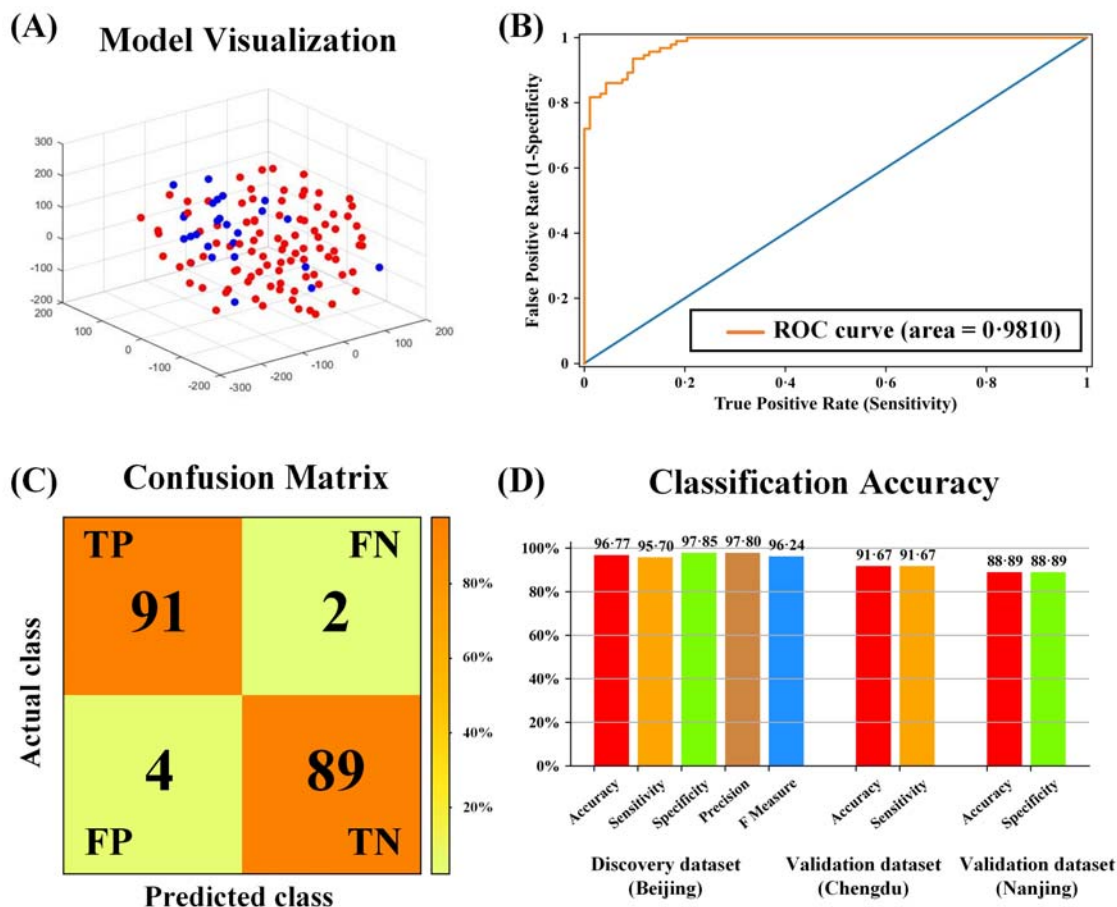

556

557 **Figure 3 Classification Accuracy between ASD and TD.** (A) Classification model in a 3-  
 558 dimensional feature space after performing dimensionality reduction using the t-distributed stochastic  
 559 neighbor embedding (t-SNE) algorithm. Red and blue dots represent ASD and TD subjects,  
 560 respectively. (B) The Receiver Operating Characteristic (ROC) curve of the training model. (C) The  
 561 confusion matrix of the training model. The colorbar represents the proportion of correctly classified  
 562 subjects among all subjects. (D) The detailed classification accuracy metrics including accuracy,  
 563 sensitivity, specificity, precision, and F measure in both discovery and validation datasets.

564
